# Supplementary figures and images for: Evidence of impaired bone quality in men with type 1 diabetes: a cross-sectional study
Source: PubMed Central journal article supplement — Endocr Connect. 2021 Jul 21;10(8):955–64. doi: 10.1530/EC-21-0193 (PMC8428087; doi:10.1530/ec-21-0193), 2021-07-21

Table 1, supplementary files

Flow chart: Enrollment and inclusion of study participants

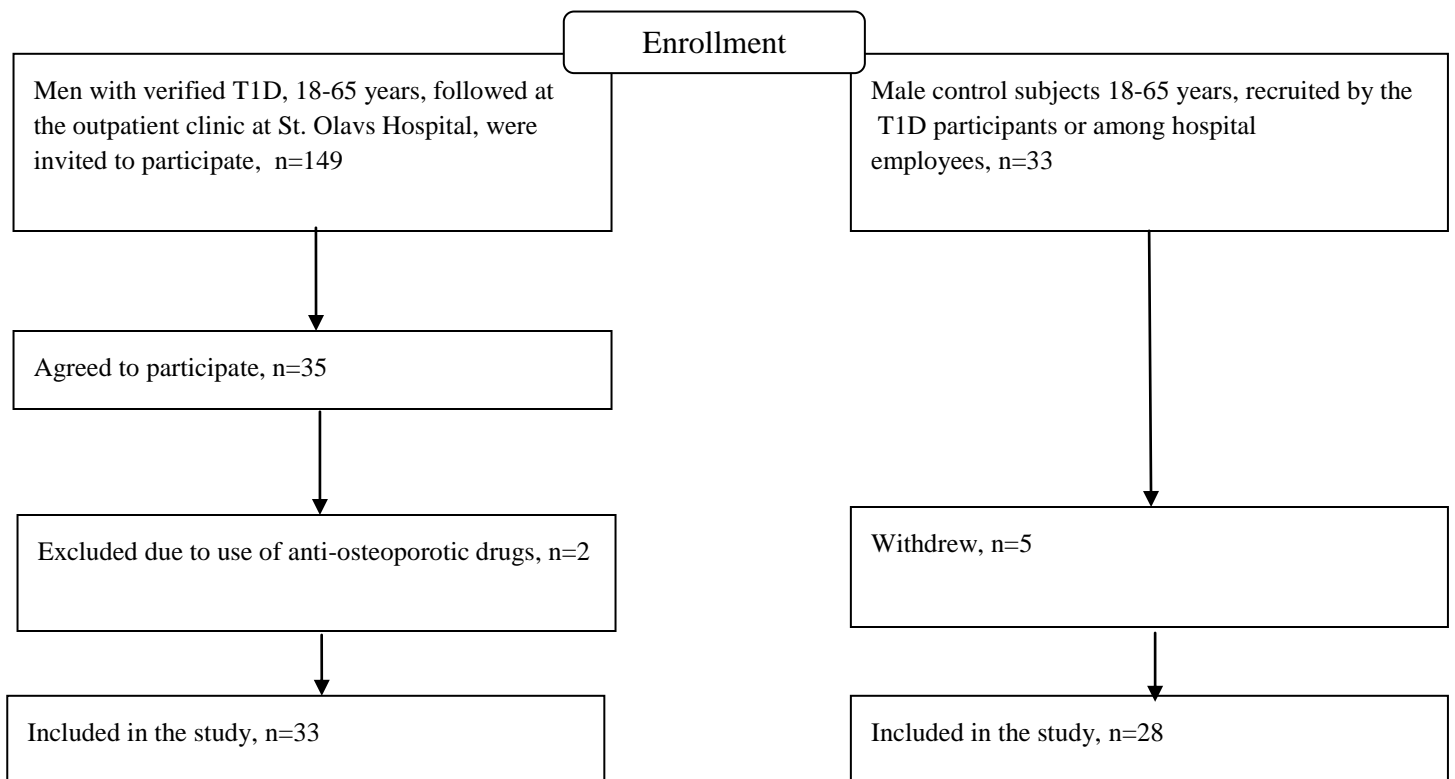

Supplement: supplementary_table_1.pdf [file supplementary_table_1.pdf]
